# Supplementary material for: New blue phosphorescent heteroleptic Ir(iii) complexes with imidazole- and N-methylimidazole carboxylates as ancillary ligands
Source: Royal Society of Chemistry journal article supplement (doi:10.1039/d0tc03773g), 2020-01-01
Supplement: d0tc03773g1.pdf [file d0tc03773g1.pdf]

Supplementary Information

**New Blue Phosphorescent Heteroleptic Ir(III) Complexes with Imidazole- and  
N-Methylimidazole Carboxylates as Ancillary Ligands**

Hea Jung Park,<sup>1\*</sup> Eun Ah Chae,<sup>1</sup> Hye Won Seo,<sup>1</sup> Jae-Ho Jang,<sup>1</sup> Won Jae Chung,<sup>2</sup> Jun Yeob  
Lee,<sup>2\*</sup> Do-Hoon Hwang,<sup>1</sup> and Ung Chan Yoon<sup>1\*</sup>

*<sup>1</sup>Department of Chemistry and Chemistry Institute for Functional Materials, Pusan National  
University, Busan 46241, Republic of Korea*

*<sup>2</sup>School of Chemical Engineering, Sungkyunkwan University, Gyeonggi 16419, Republic of  
Korea*

\*To whom correspondence should be addressed.

E-mail: heajungp@pusan.ac.kr, leej17@skku.edu, ucyoon@pusan.ac.kr

**Contents**

**Section S1. Absorption and Emission spectra of *Ir1-Ir4*.**

**Section S2. Electrochemical properties of *Ir1-Ir4*.**

**Section S3. Thermal properties of *Ir3* and *Ir4*.**

**Section S4. Device performances of *Ir3*, *Ir4*, and *FIrpic* (reference).**

**Section S5. Crystal data of *Ir1* and *Ir3*.**

**Section S6. <sup>1</sup>H-, <sup>13</sup>C-, and <sup>19</sup>F-NMR spectra of *Ir1-Ir4*.**

Section S1. Absorption and Emission spectra of *Ir1-Ir4*.

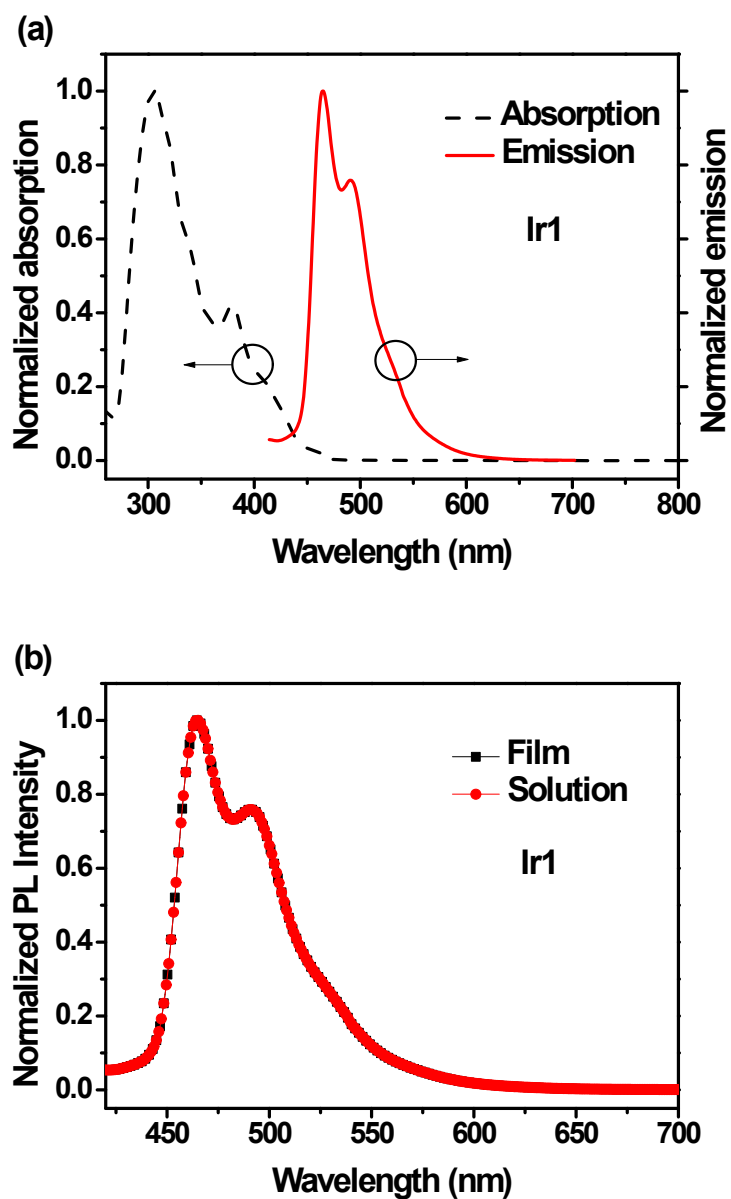

Figure S1. (a) UV-vis absorption (dotted) and emission spectra (line) in solution state and (b) comparison of emission spectra in film (square) vs. solution (circle) state of **Ir1**.

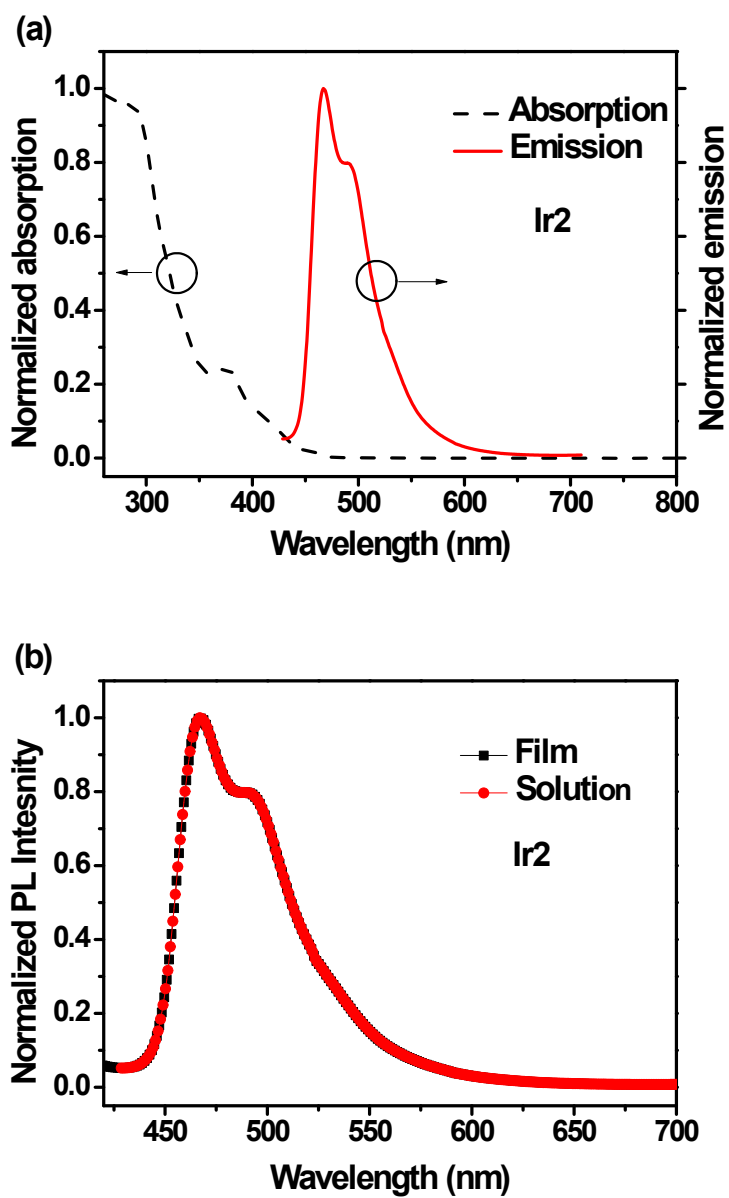

Figure S2. (a) UV-vis absorption (dotted) and emission spectra (line) in solution state and (b) comparison of emission spectra in film (square) vs. solution (circle) state of **Ir2**.

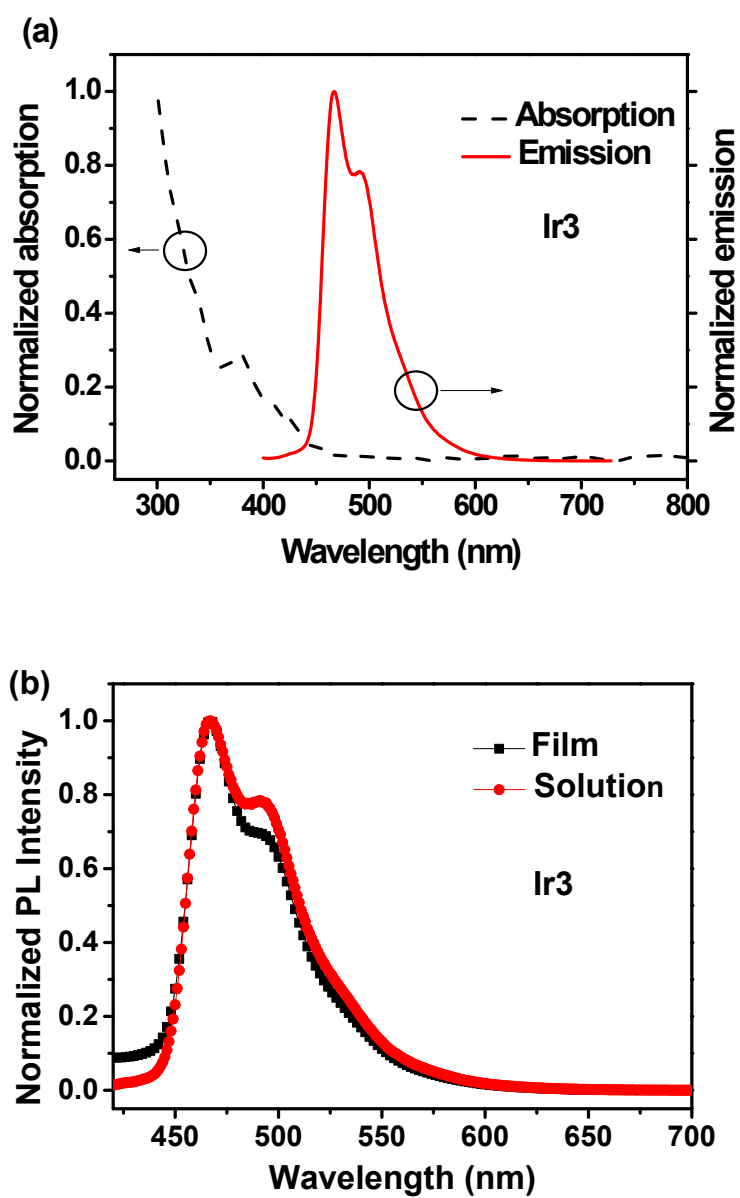

Figure S3. (a) UV-vis absorption (dotted) and emission spectra (line) in solution state and (b) comparison of emission spectra in film (square) vs. solution (circle) state of **Ir3**.

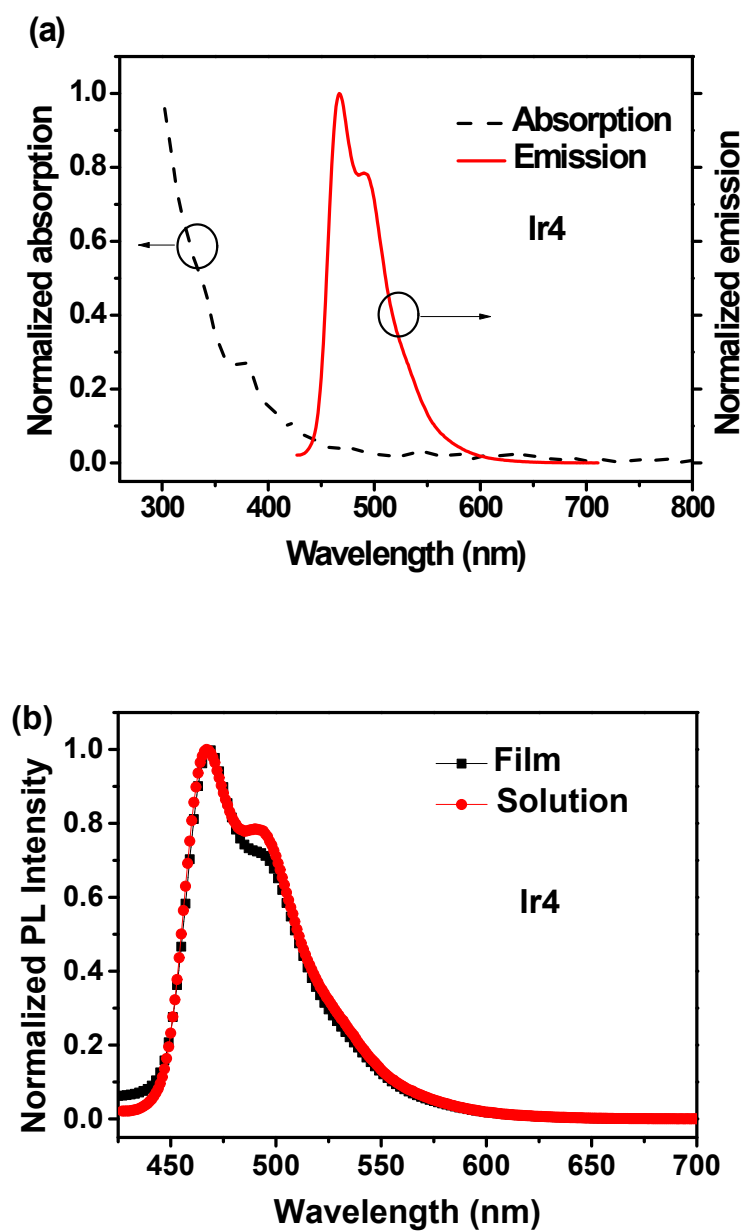

Figure S4. (a) UV-vis absorption (dotted) and emission spectra (line) in solution state and (b) comparison of emission spectra in film (square) vs. solution (circle) state of **Ir4**.

Section S2. Electrochemical properties of *Ir1-Ir4*.

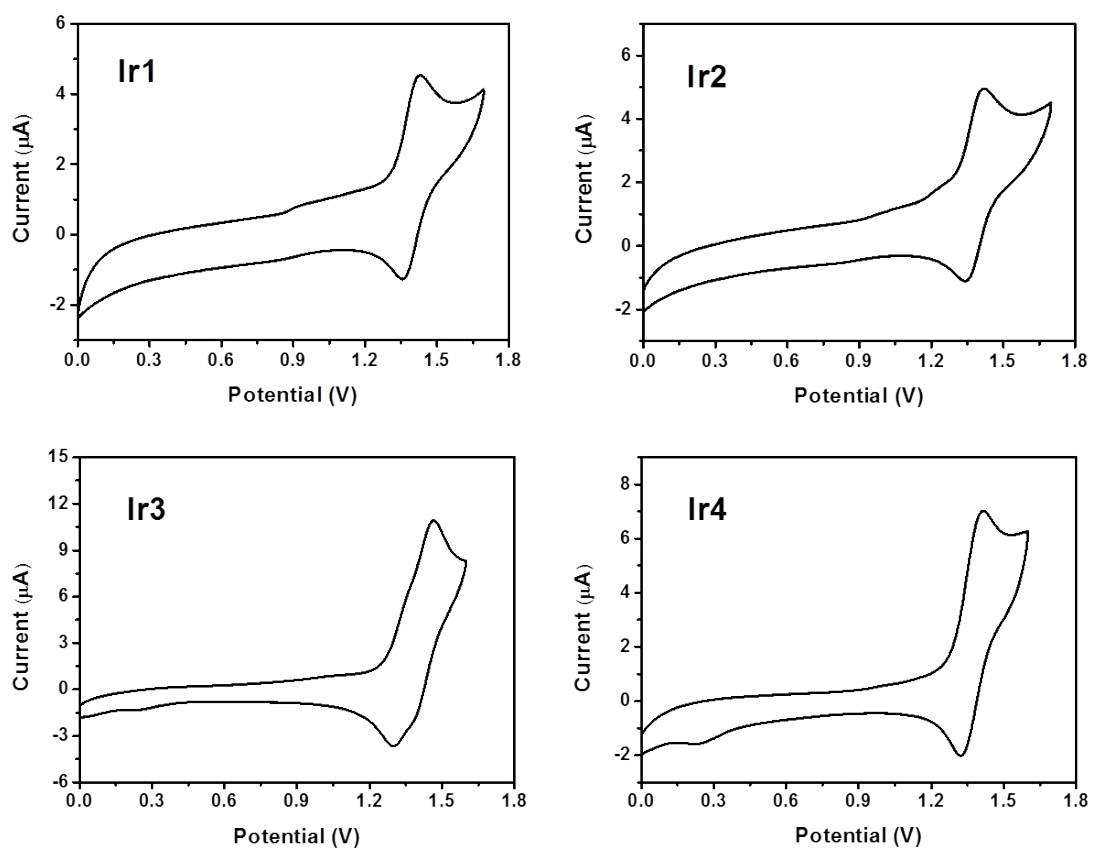

Figure S5. Cyclic voltammograms (CV) of iridium (III) complexes, **Ir1~Ir4**.

Section S3. Thermal properties of *Ir3* and *Ir4*.

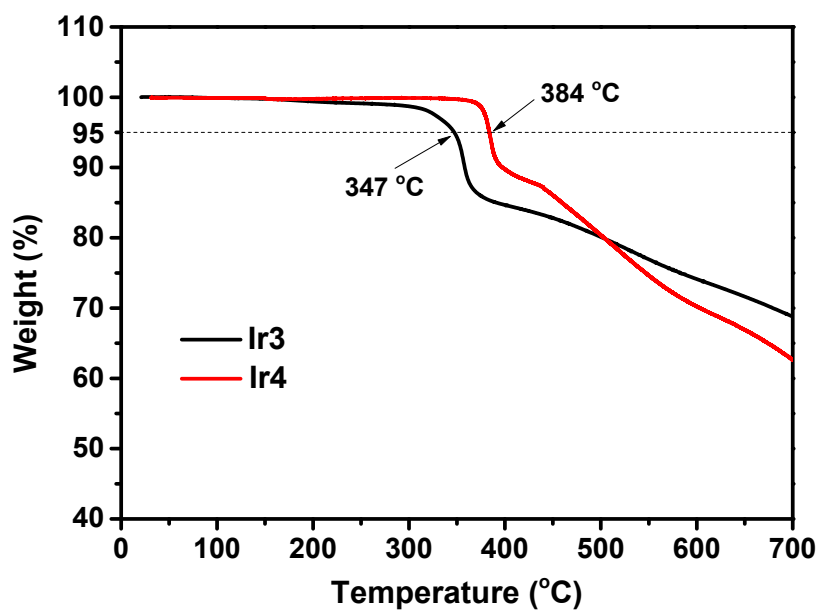

Figure S6. TGA curves of Ir(III) complexes, **Ir3** and **Ir4**.

Section S4. Device performances of *Ir3*, *Ir4*, and *Flrpic* (reference).

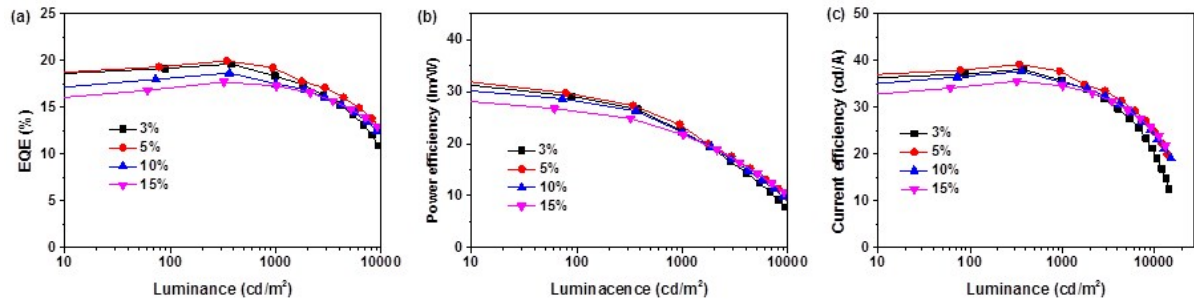

Figure S7. (a) *EQE-L*, (b) *PE-L*, and (c) *CE-L* curves of **Ir3** at different doping ratio.

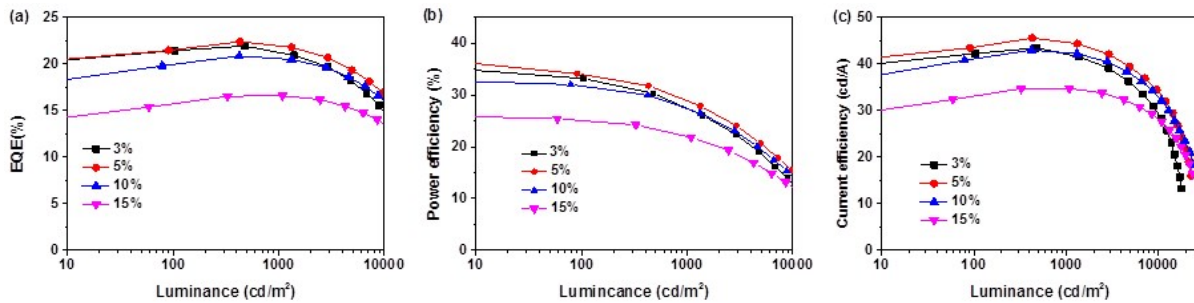

Figure S8. (a) *EQE-L*, (b) *PE-L*, and (c) *CE-L* curves of **Ir4** at different doping ratio.

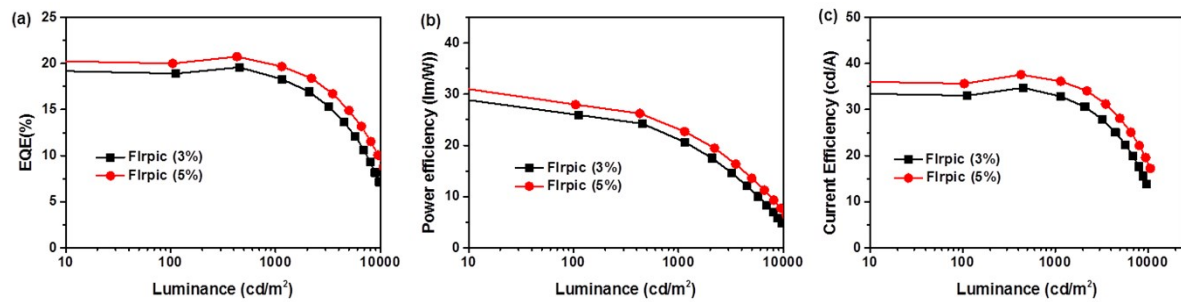

Figure S9. (a) *EQE-L*, (b) *PE-L*, and (c) *CE-L* curves of **Flrpic** as a reference device at different doping ratio.



Supplementary Information

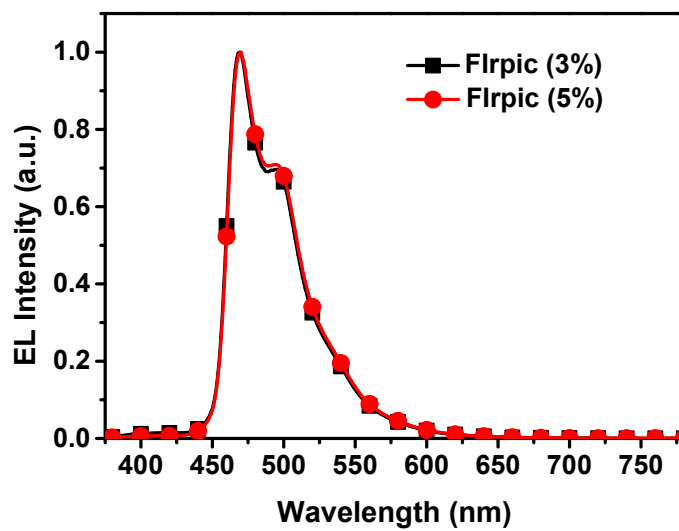

Figure S10. Electroluminescence (EL) spectra of **Flrpic** at different doping ratio.

## Supplementary Information

### Section S5. Crystal data of *Ir1*.

The CCDC deposit numbers of Ir(III) crystals are as follows. **Ir1** (1504882) and **Ir3** (2032373).

Table S1. Crystal data and structure refinement of **Ir1**.

|                                   |                                                                                                                                   |                             |
|-----------------------------------|-----------------------------------------------------------------------------------------------------------------------------------|-----------------------------|
| Identification code               | <b>Ir1</b>                                                                                                                        |                             |
| Empirical formula                 | C <sub>34.86</sub> H <sub>25.71</sub> Cl <sub>8.57</sub> F <sub>4.57</sub> Ir <sub>1.14</sub> N <sub>4.57</sub> O <sub>2.86</sub> |                             |
| Formula weight                    | 1164.69                                                                                                                           |                             |
| Temperature                       | 173(2) K                                                                                                                          |                             |
| Wavelength                        | 0.71073 Å                                                                                                                         |                             |
| Crystal system                    | Monoclinic                                                                                                                        |                             |
| Space group                       | P2(1)/c                                                                                                                           |                             |
| Unit cell dimensions              | a = 17.8294(6) Å                                                                                                                  | $\alpha = 90^\circ$ .       |
|                                   | b = 18.6005(6) Å                                                                                                                  | $\beta = 97.526(2)^\circ$ . |
|                                   | c = 22.9797(7) Å                                                                                                                  | $\gamma = 90^\circ$ .       |
| Volume                            | 7555.2(4) Å <sup>3</sup>                                                                                                          |                             |
| Z                                 | 7                                                                                                                                 |                             |
| Density (calculated)              | 1.792 Mg/m <sup>3</sup>                                                                                                           |                             |
| Absorption coefficient            | 4.121 mm <sup>-1</sup>                                                                                                            |                             |
| F(000)                            | 3952                                                                                                                              |                             |
| Crystal size                      | 0.31 x 0.28 x 0.06 mm <sup>3</sup>                                                                                                |                             |
| Theta range for data collection   | 1.15 to 27.54°.                                                                                                                   |                             |
| Index ranges                      | -23 ≤ h ≤ 23, -24 ≤ k ≤ 20, -28 ≤ l ≤ 29                                                                                          |                             |
| Reflections collected             | 70108                                                                                                                             |                             |
| Independent reflections           | 17349 [R(int) = 0.1221]                                                                                                           |                             |
| Completeness to theta = 27.54°    | 99.6 %                                                                                                                            |                             |
| Absorption correction             | SADABS                                                                                                                            |                             |
| Max. and min. transmission        | 0.7901 and 0.3568                                                                                                                 |                             |
| Refinement method                 | Full-matrix least-squares on F <sup>2</sup>                                                                                       |                             |
| Data / restraints / parameters    | 17349 / 6 / 894                                                                                                                   |                             |
| Goodness-of-fit on F <sup>2</sup> | 1.047                                                                                                                             |                             |
| Final R indices [I > 2σ(I)]       | R1 = 0.0618, wR2 = 0.1863                                                                                                         |                             |
| R indices (all data)              | R1 = 0.0814, wR2 = 0.1970                                                                                                         |                             |
| Largest diff. peak and hole       | 3.797 and -4.279 e.Å <sup>-3</sup>                                                                                                |                             |

## Supplementary Information

Table S2. Crystal data and structure refinement of **Ir3**.

|                                   |                                                                                 |                |
|-----------------------------------|---------------------------------------------------------------------------------|----------------|
| Identification code               | <b>Ir3</b>                                                                      |                |
| Empirical formula                 | C <sub>29</sub> H <sub>21</sub> F <sub>4</sub> Ir N <sub>4</sub> O <sub>2</sub> |                |
| Formula weight                    | 725.70                                                                          |                |
| Temperature                       | 293(2) K                                                                        |                |
| Wavelength                        | 0.71073 Å                                                                       |                |
| Crystal system                    | Monoclinic                                                                      |                |
| Space group                       | P2 <sub>1</sub> /c                                                              |                |
| Unit cell dimensions              | a = 10.365(2) Å                                                                 | α = 90°.       |
|                                   | b = 10.696(2) Å                                                                 | β = 98.90(3)°. |
|                                   | c = 23.837(5) Å                                                                 | γ = 90°.       |
| Volume                            | 2610.6(9) Å <sup>3</sup>                                                        |                |
| Z                                 | 4                                                                               |                |
| Density (calculated)              | 1.846 Mg/m <sup>3</sup>                                                         |                |
| Absorption coefficient            | 5.178 mm <sup>-1</sup>                                                          |                |
| F(000)                            | 1408                                                                            |                |
| Crystal size                      | 0.300 x 0.300 x 0.300 mm <sup>3</sup>                                           |                |
| Theta range for data collection   | 3.084 to 27.483°.                                                               |                |
| Index ranges                      | -13 ≤ h ≤ 13, -13 ≤ k ≤ 13, -30 ≤ l ≤ 30                                        |                |
| Reflections collected             | 22582                                                                           |                |
| Independent reflections           | 5944 [R(int) = 0.1389]                                                          |                |
| Completeness to theta = 25.242°   | 99.7 %                                                                          |                |
| Absorption correction             | Semi-empirical from equivalents                                                 |                |
| Max. and min. transmission        | 0.211 and 0.048                                                                 |                |
| Refinement method                 | Full-matrix least-squares on F <sup>2</sup>                                     |                |
| Data / restraints / parameters    | 5944 / 0 / 364                                                                  |                |
| Goodness-of-fit on F <sup>2</sup> | 1.155                                                                           |                |
| Final R indices [I > 2σ(I)]       | R1 = 0.1046, wR2 = 0.2200                                                       |                |
| R indices (all data)              | R1 = 0.1281, wR2 = 0.2305                                                       |                |
| Extinction coefficient            | n/a                                                                             |                |
| Largest diff. peak and hole       | 4.262 and -5.326 e.Å <sup>-3</sup>                                              |                |

Section S6.  $^1\text{H}$ -,  $^{13}\text{C}$ -, and  $^{19}\text{F}$ -NMR spectra of *Ir1-Ir4*.

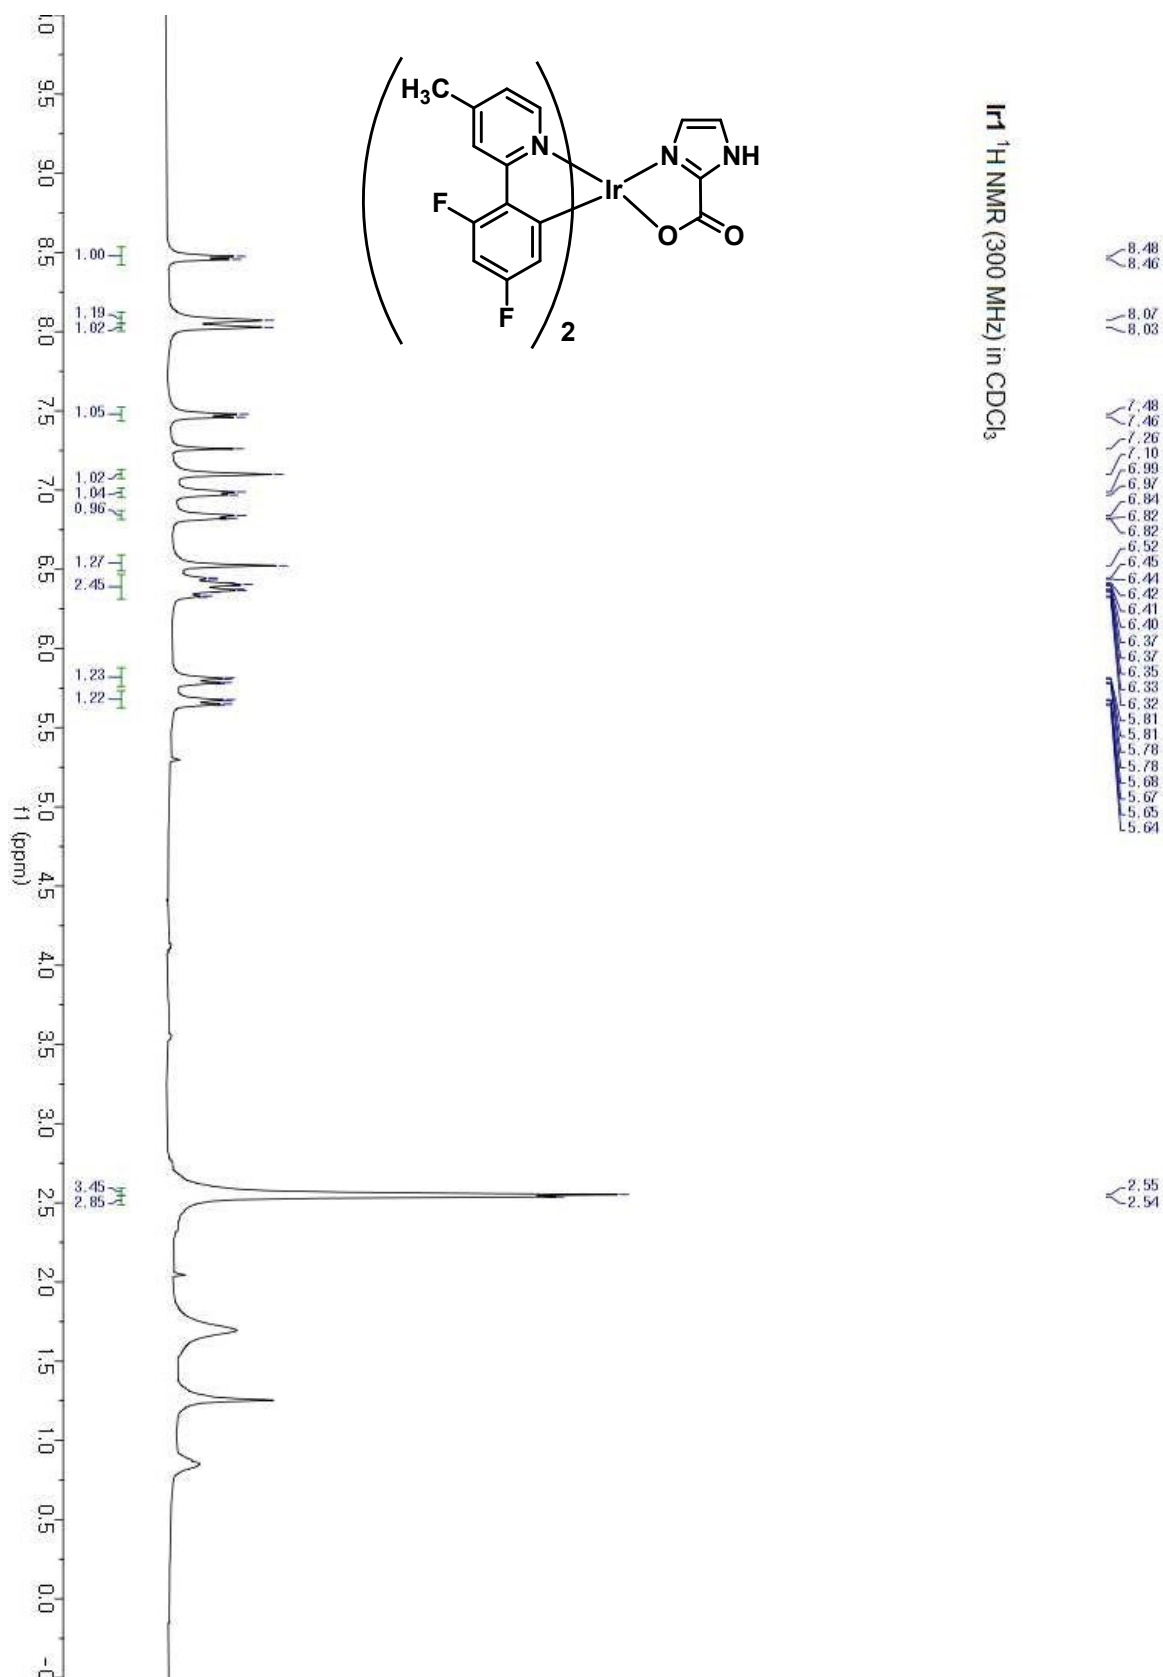

Figure S11.  $^1\text{H}$ -NMR spectra of **Ir1**.

Supplementary Information

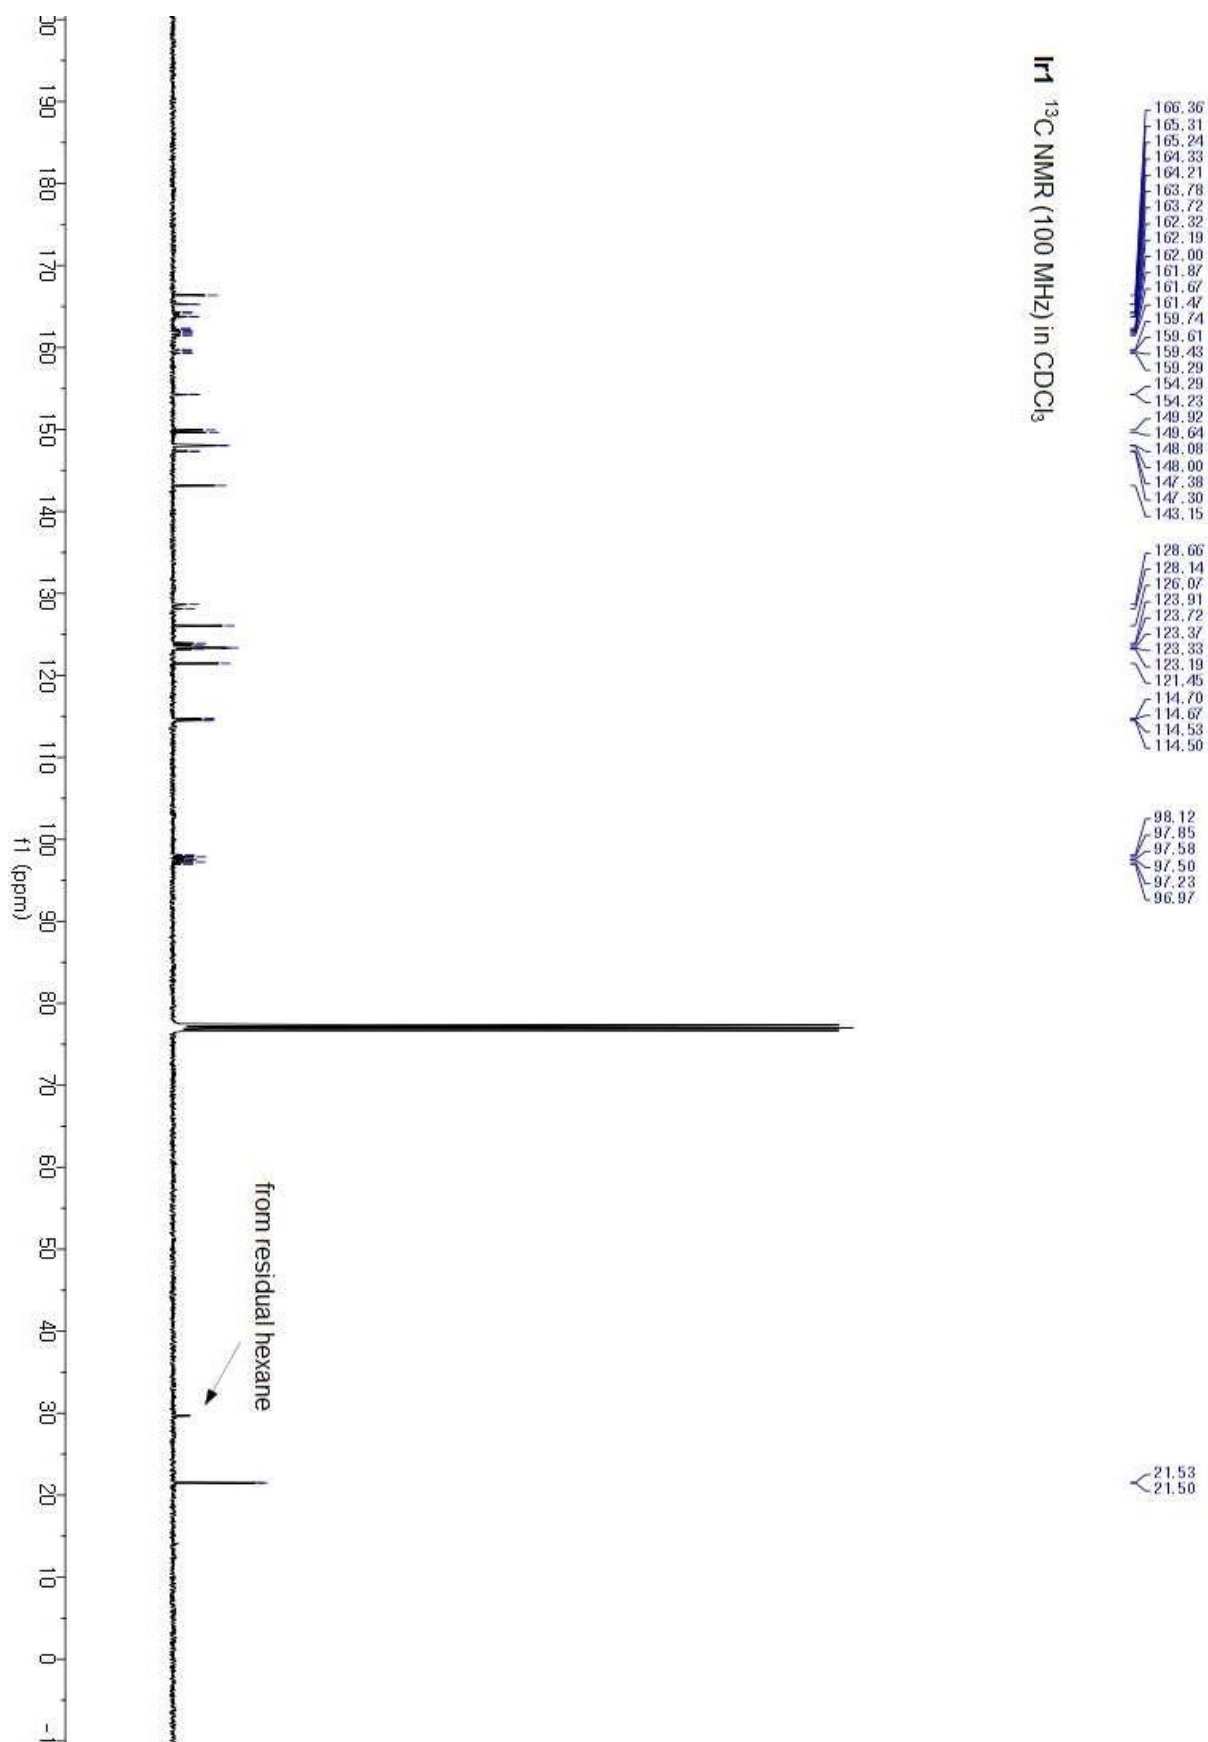

Figure S12.  $^{13}\text{C}$ -NMR spectra of **Ir1**.

Supplementary Information

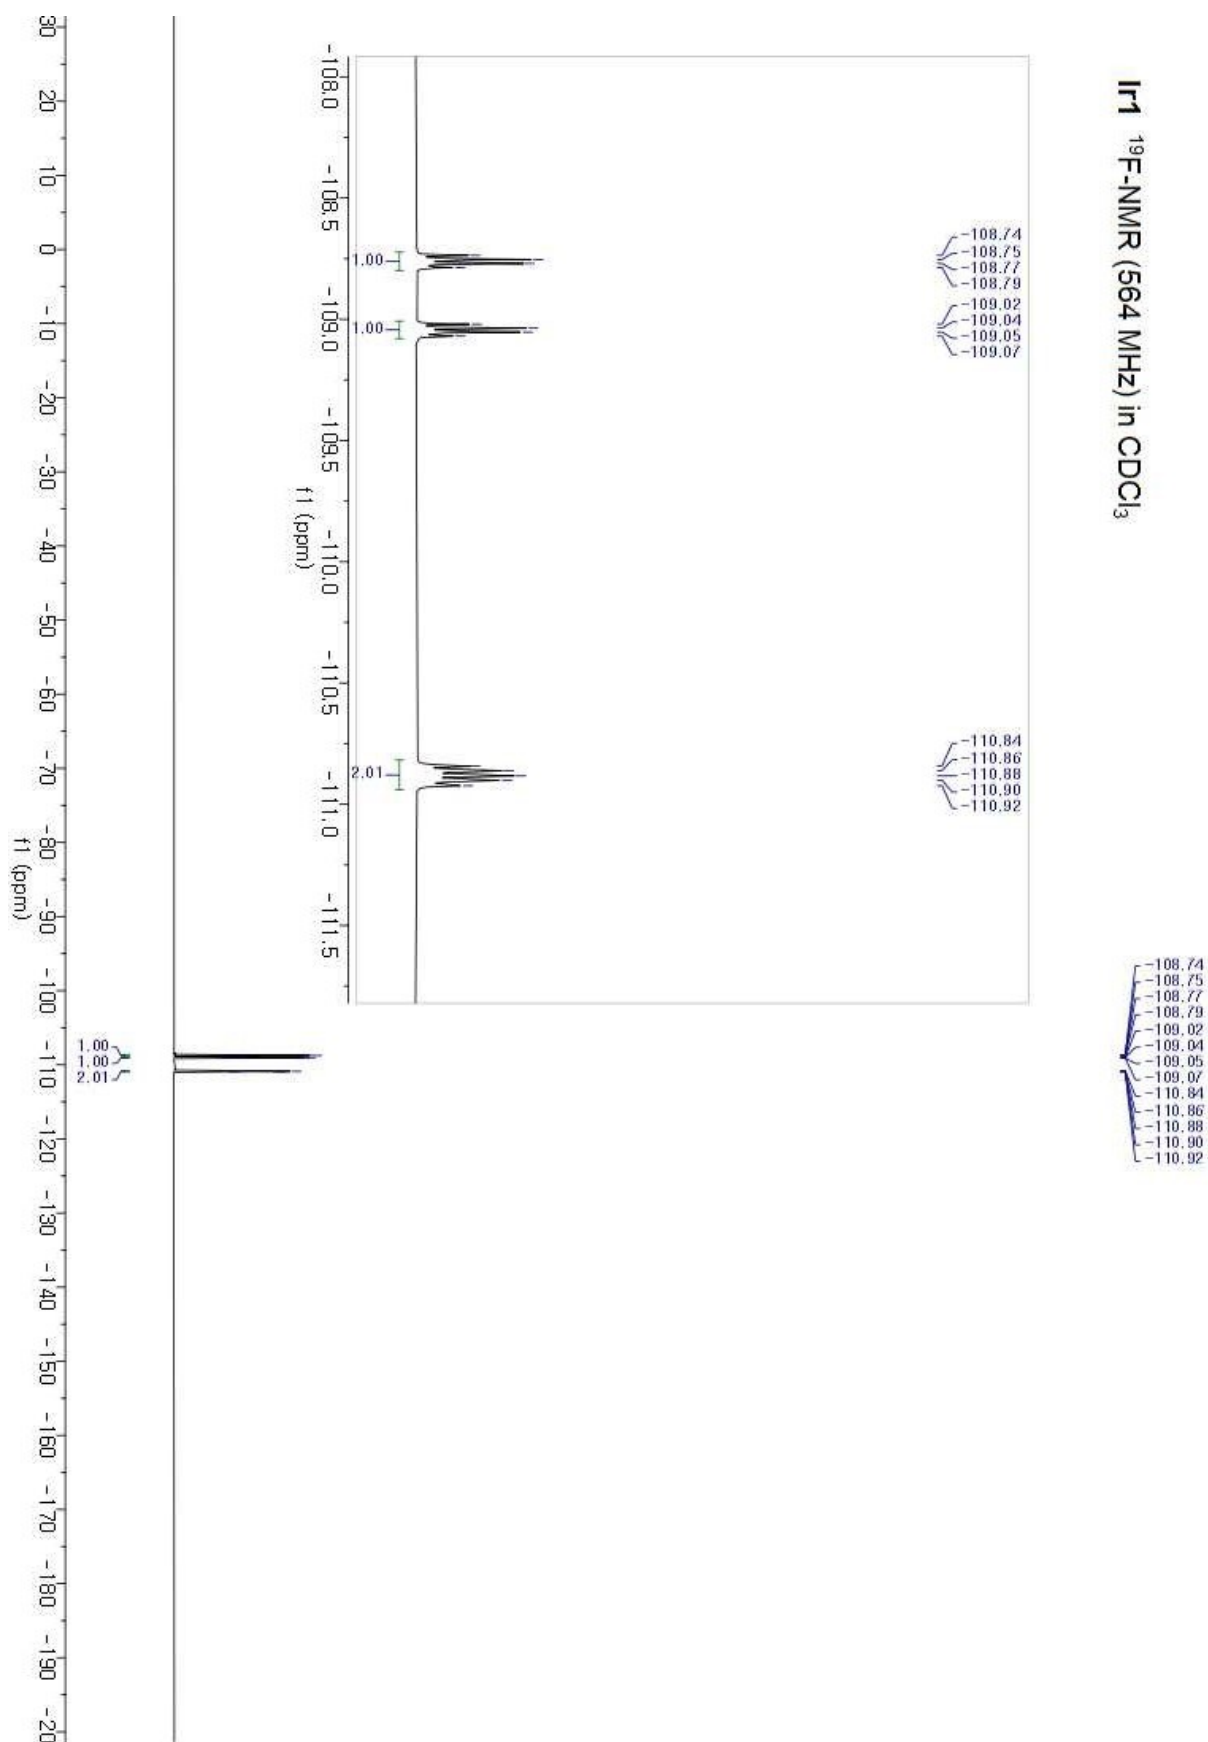

Supplementary Information

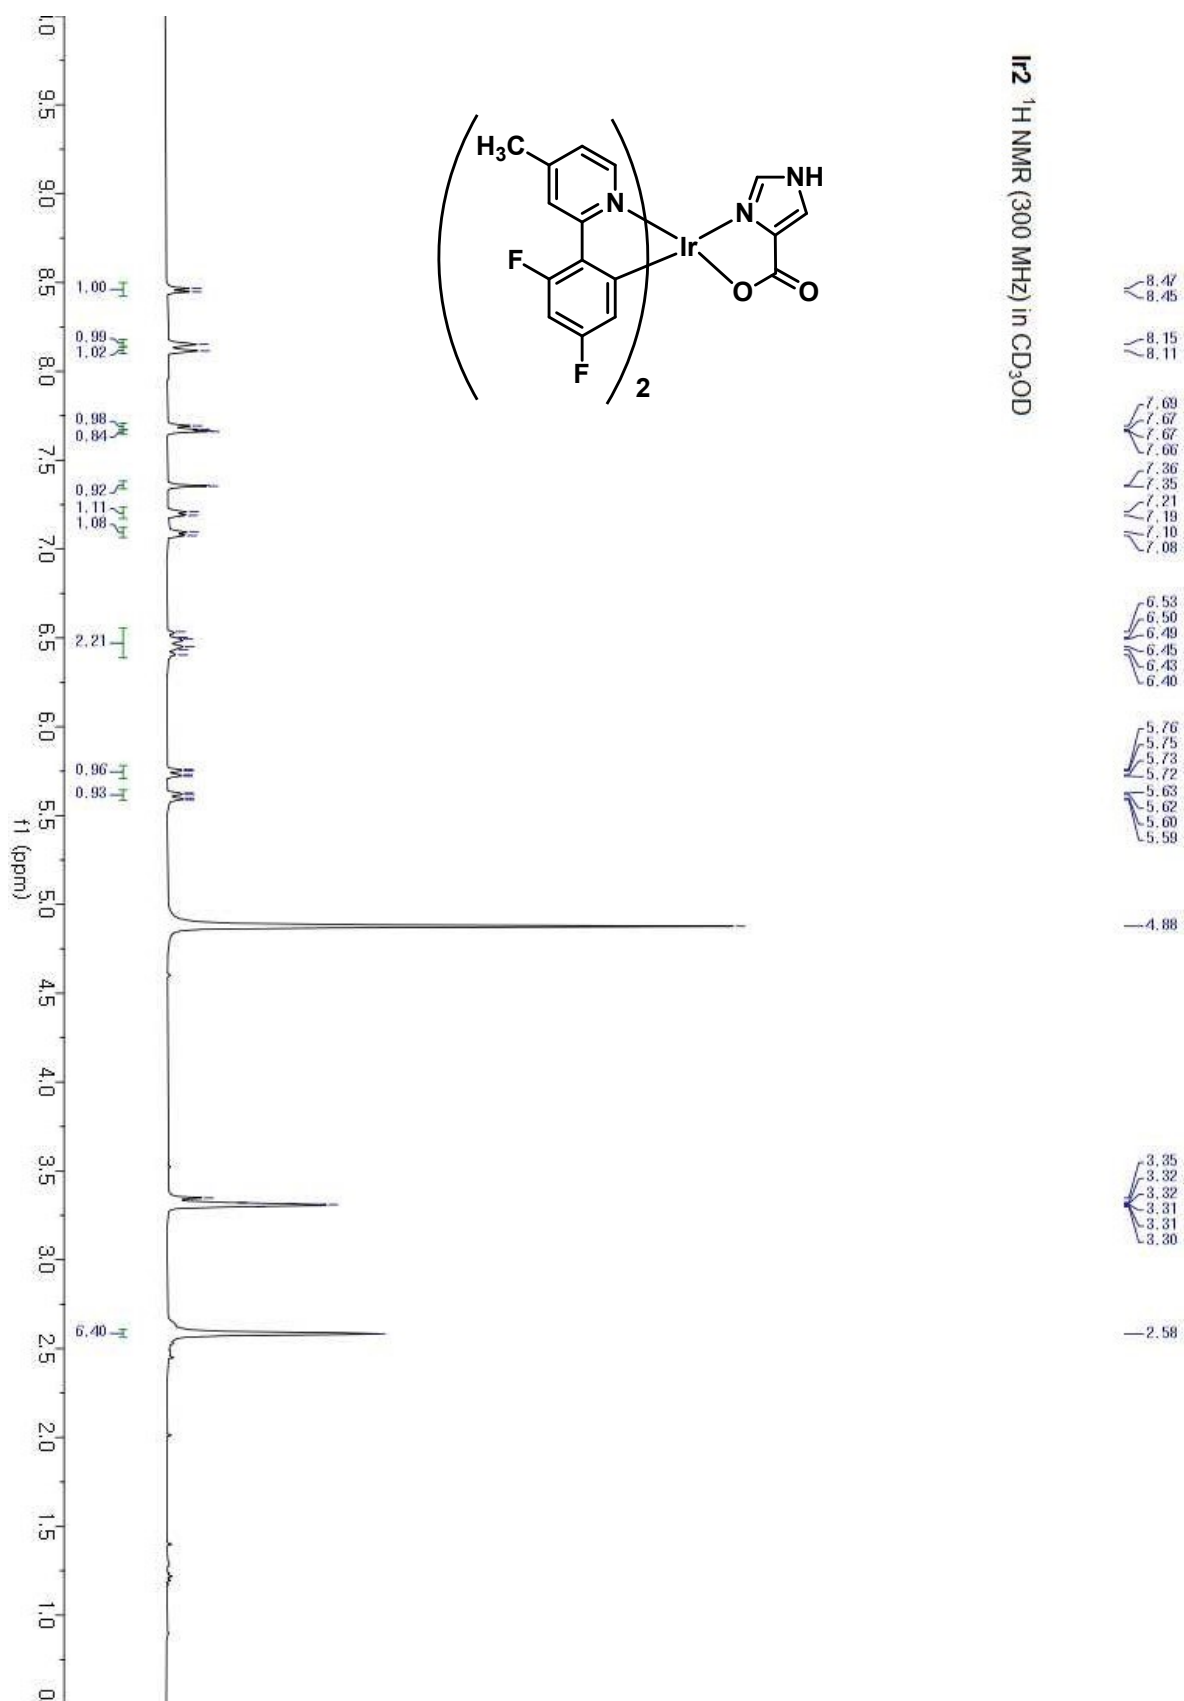

Figure S14. <sup>1</sup>H-NMR spectra of **Ir2**.

Supplementary Information

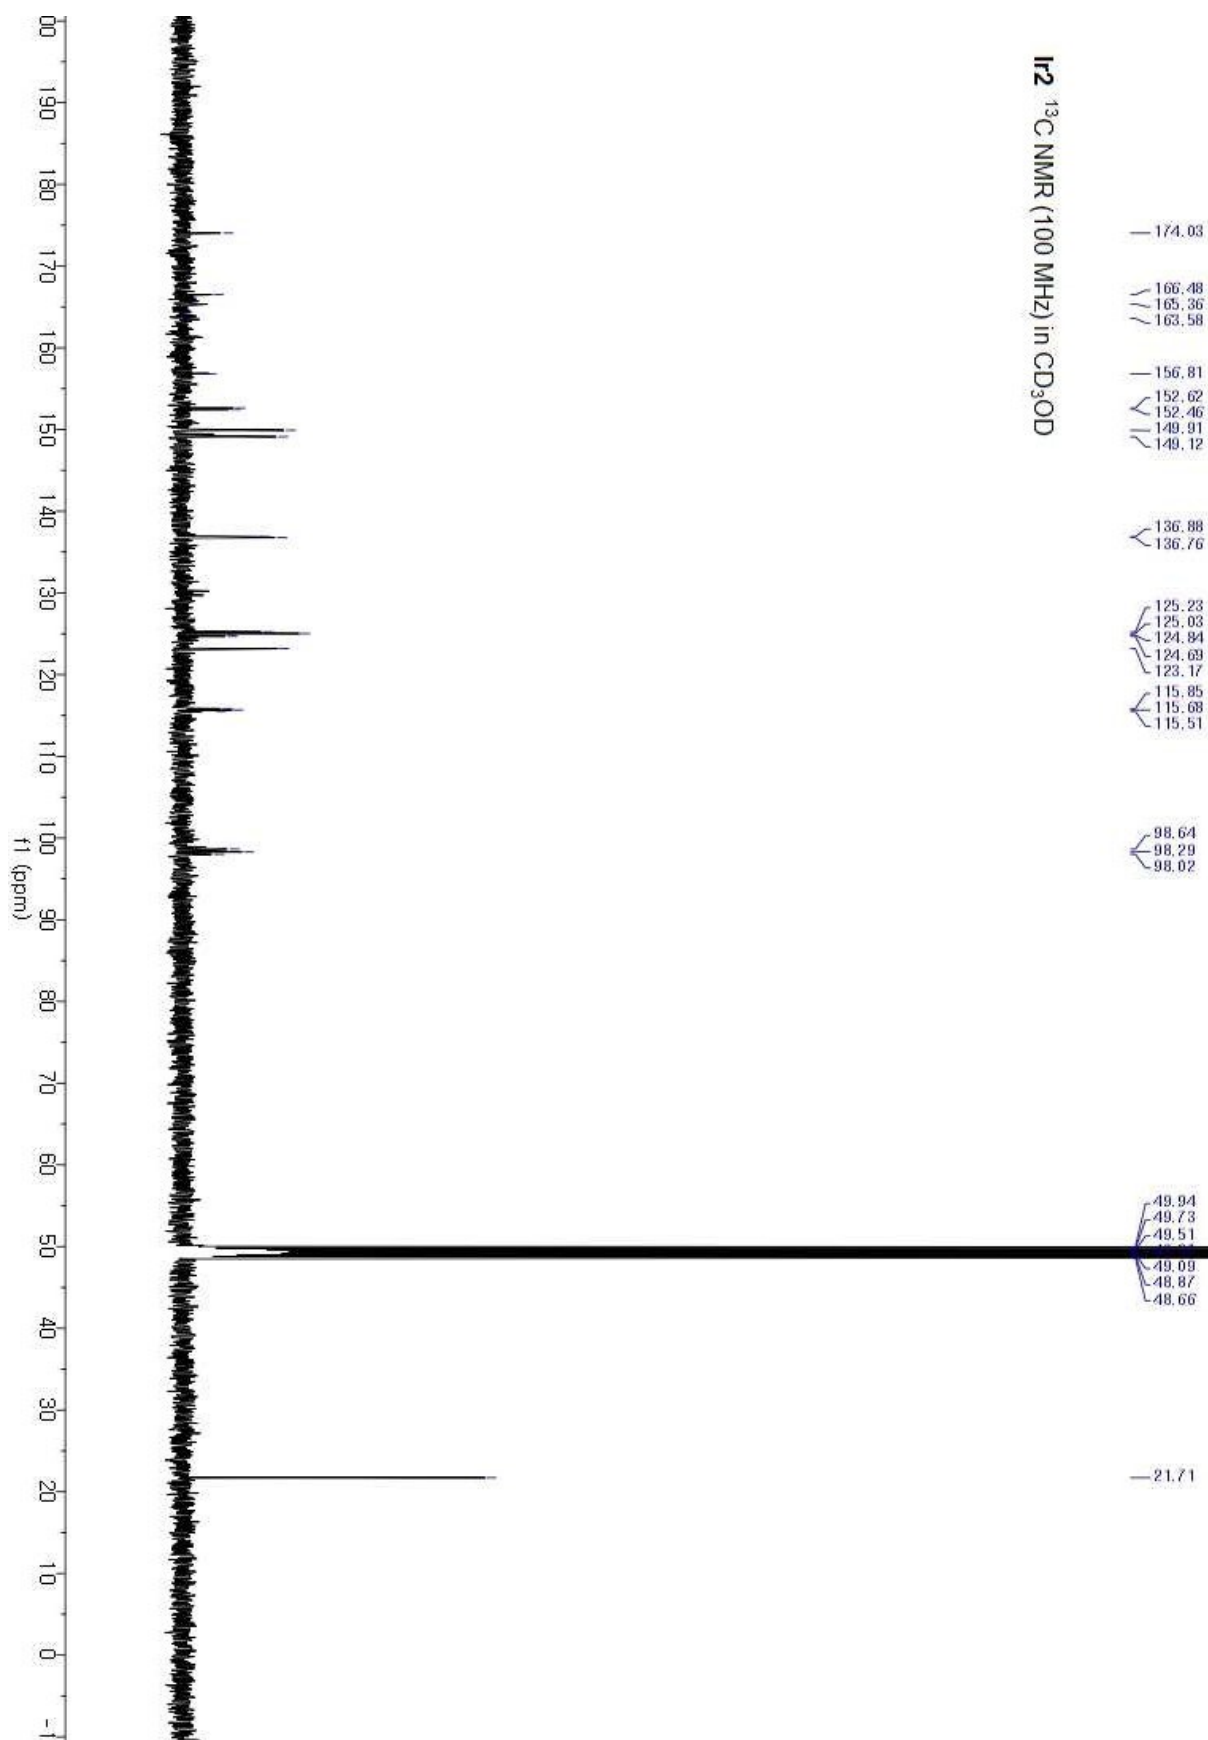

Figure S15.  $^{13}\text{C}$ -NMR spectra of **Ir2**.



Supplementary Information

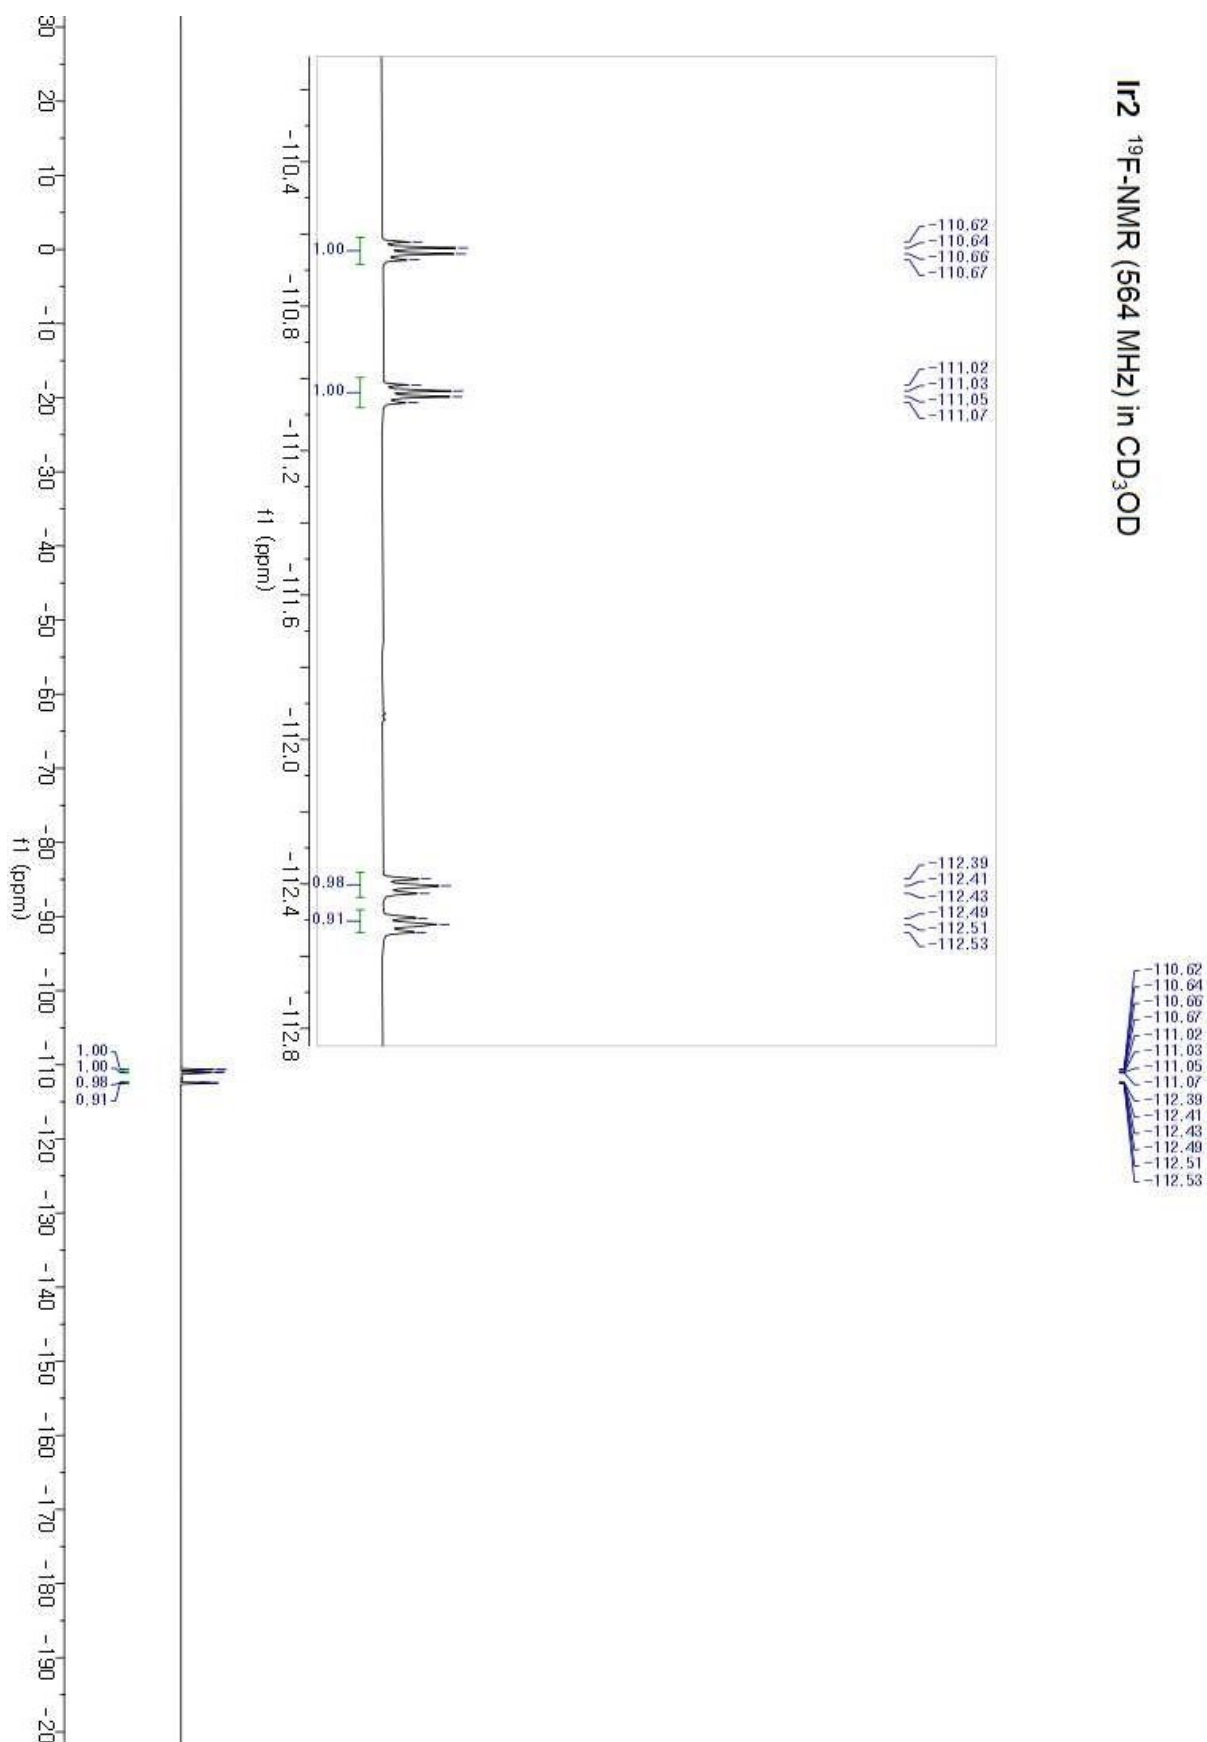

Figure S16.  $^{19}\text{F}$ -NMR spectra of **Ir2**.

Supplementary Information

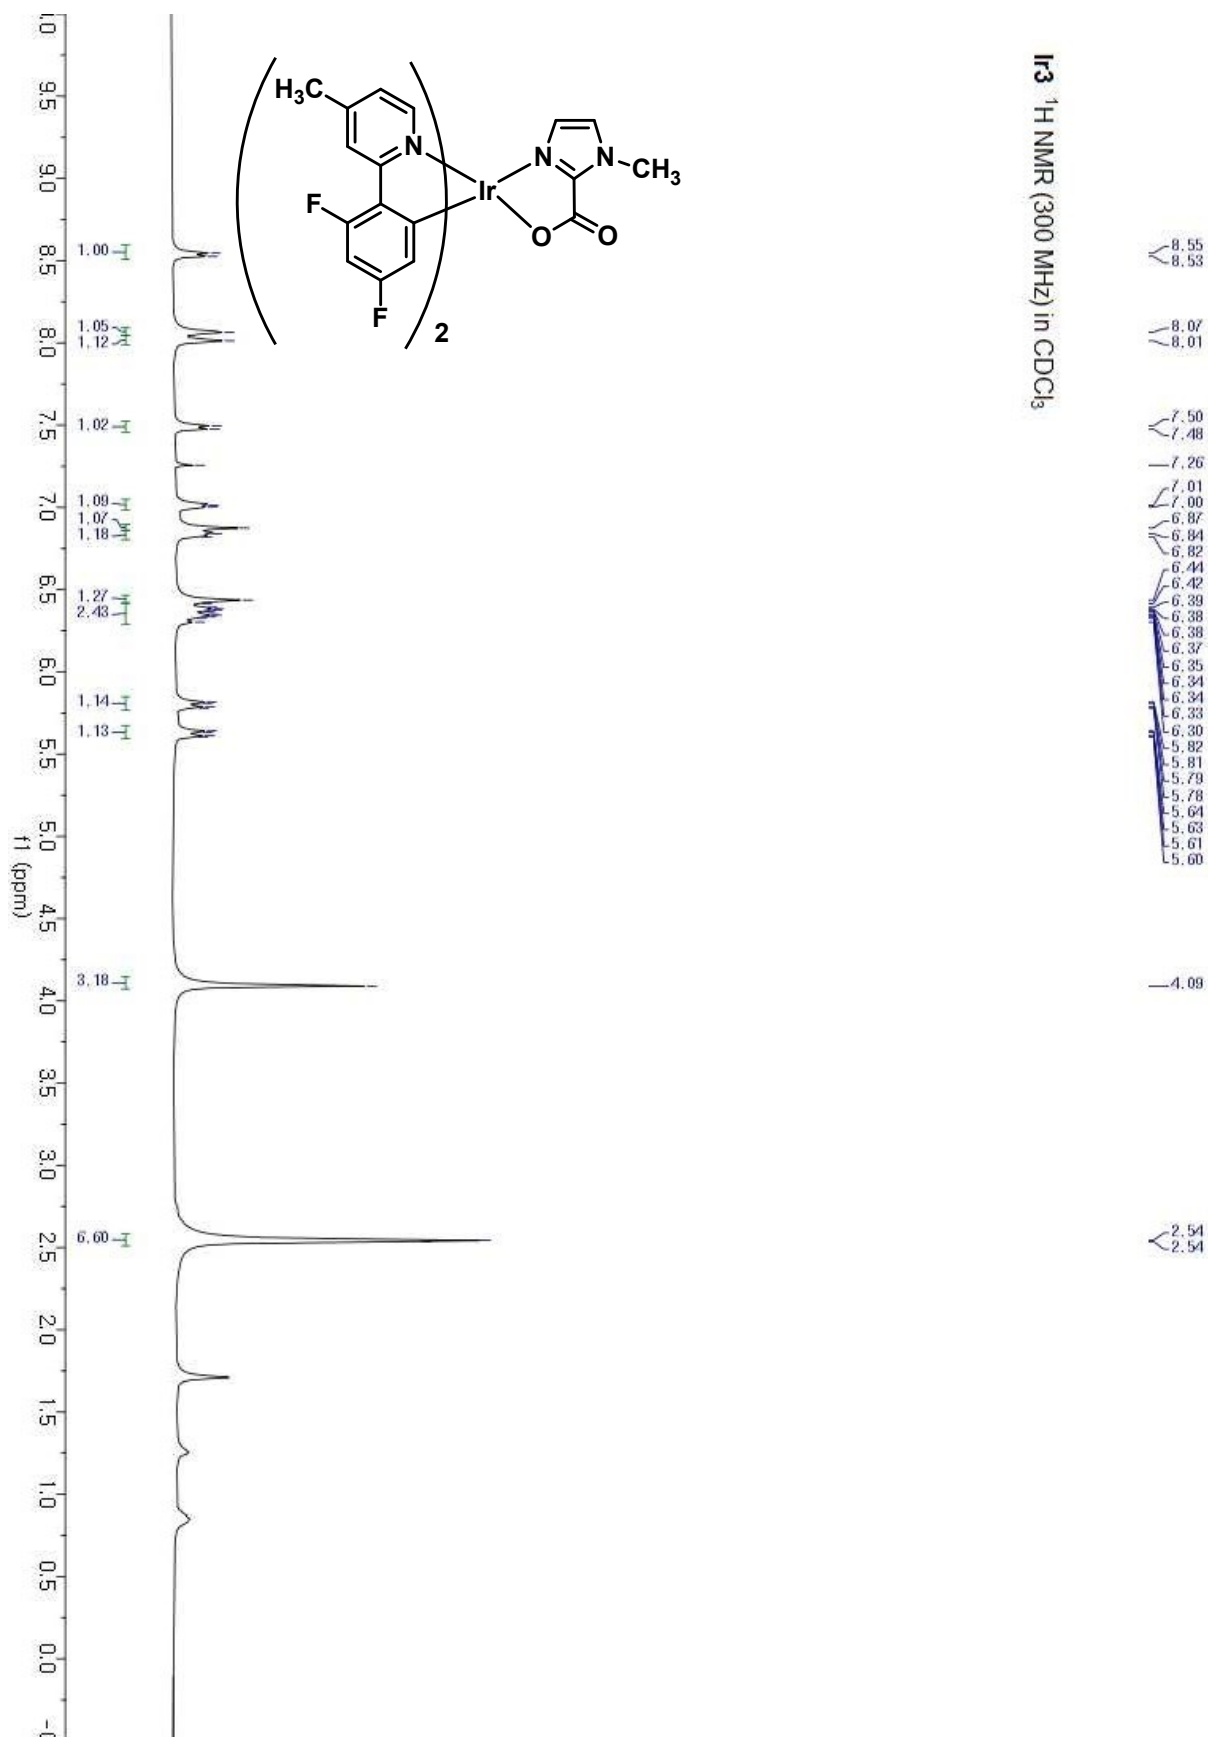

Figure S17. <sup>1</sup>H-NMR spectra of Ir3.

Supplementary Information

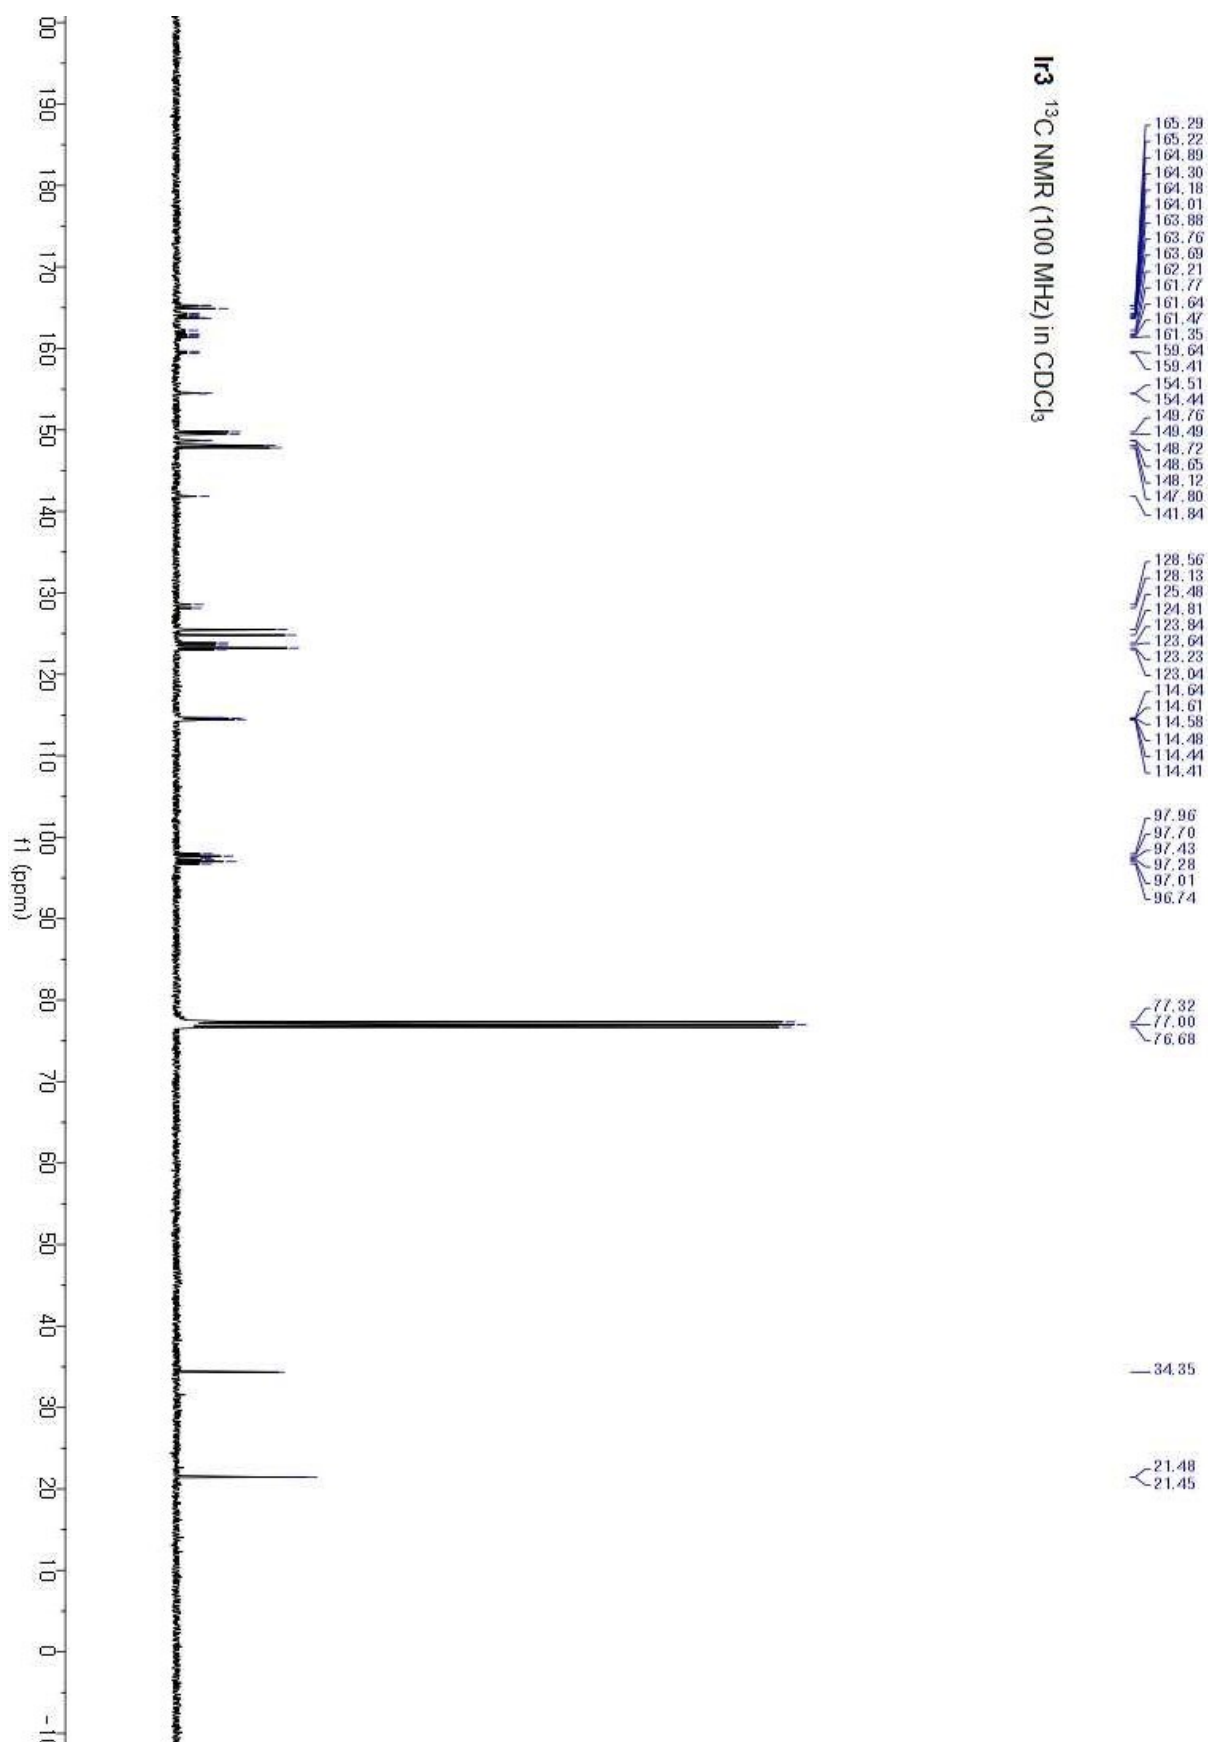

Figure S18.  $^{13}\text{C}$ -NMR spectra of **Ir3**.

Supplementary Information

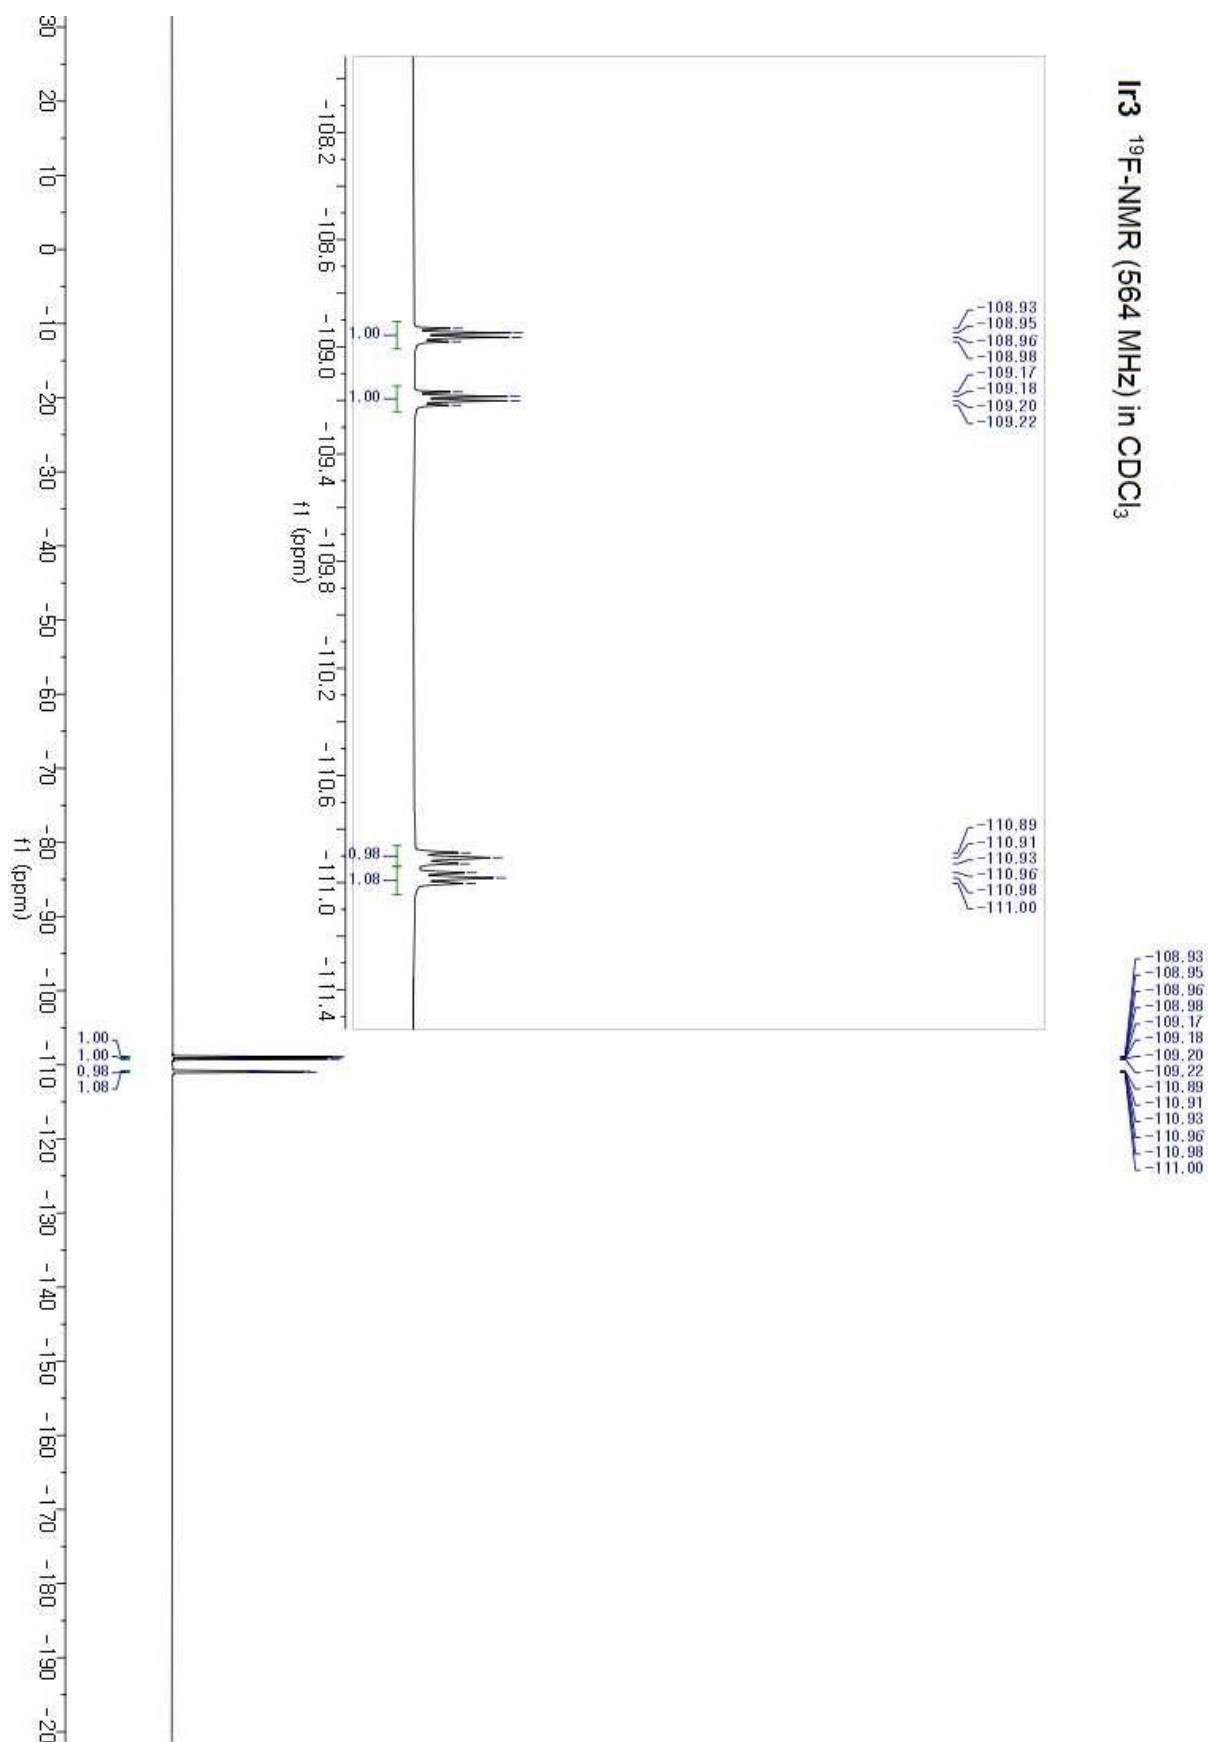

Figure S19.  $^{19}\text{F}$ -NMR spectra of **Ir3**.

Supplementary Information

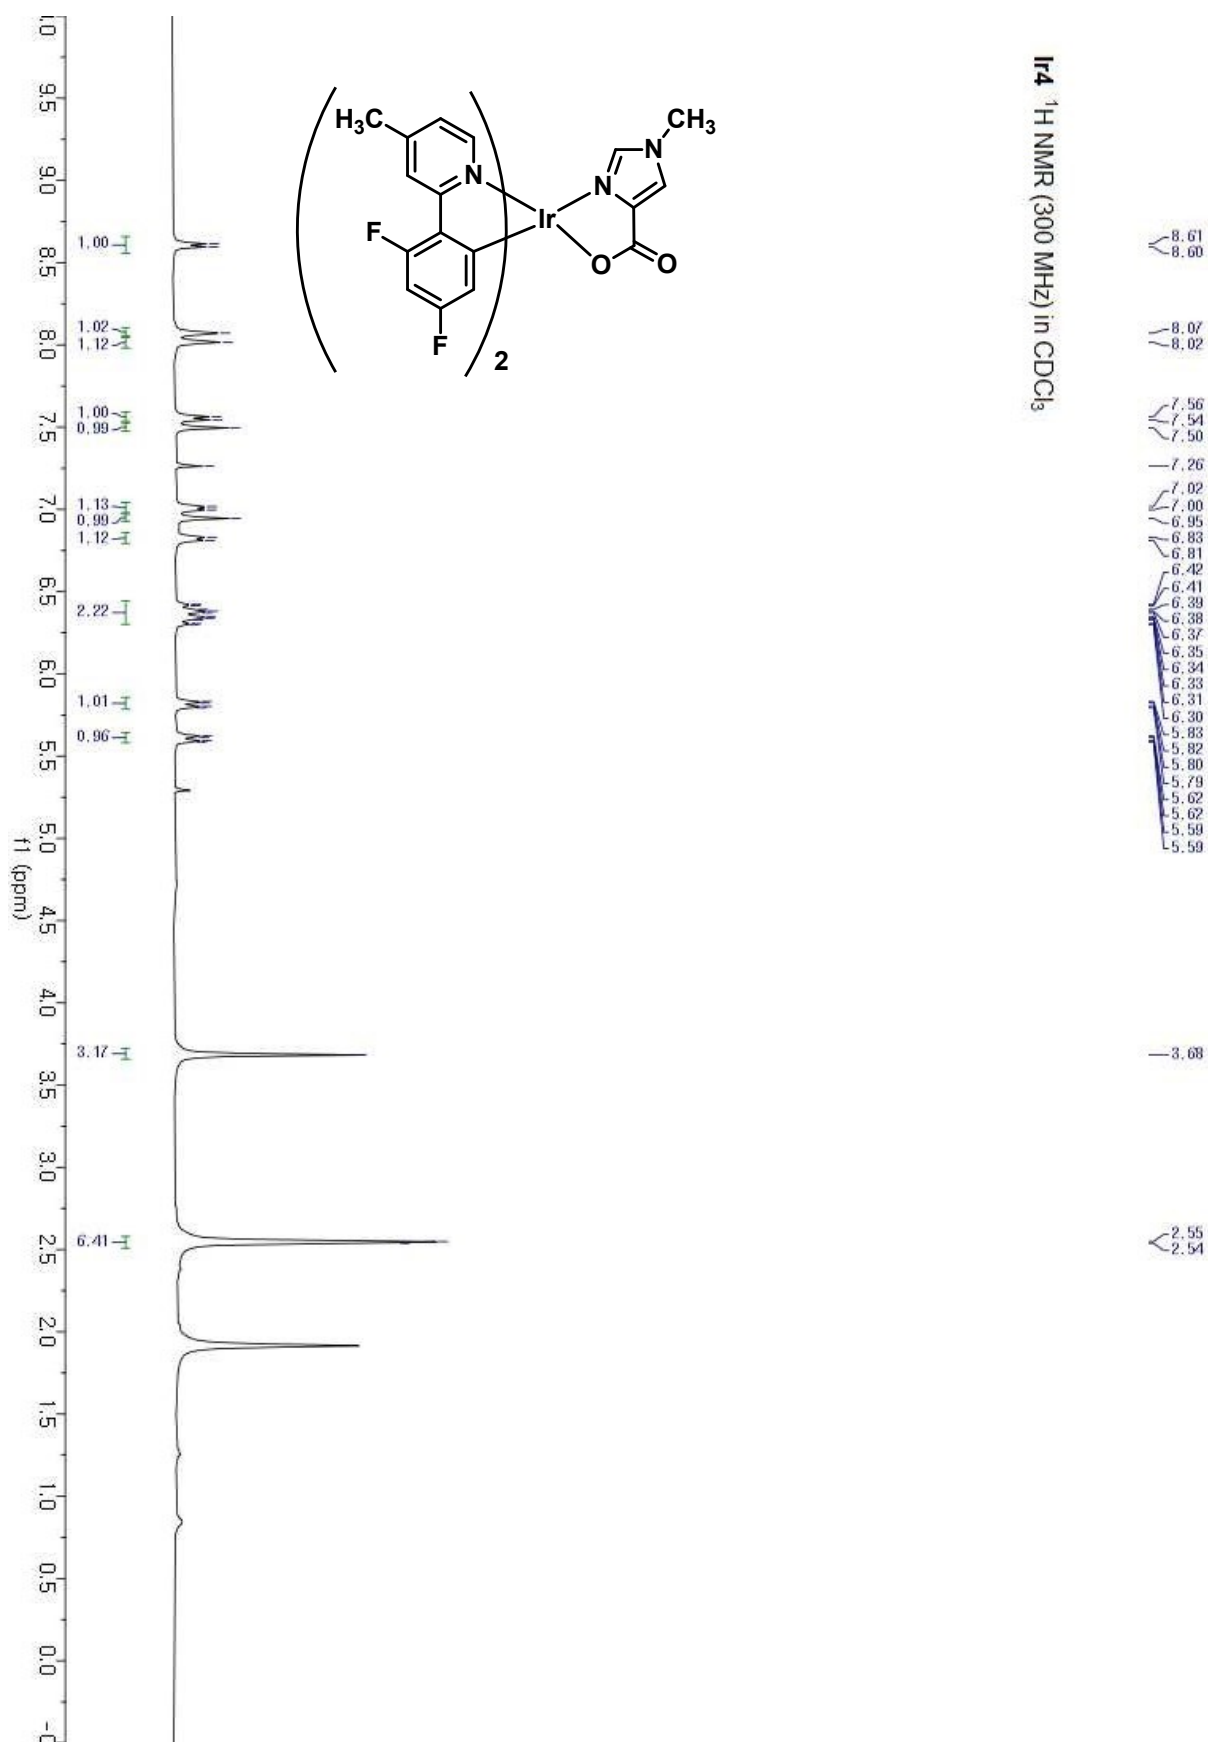

Figure S20.  $^1\text{H}$ -NMR spectra of **Ir4**.

Supplementary Information

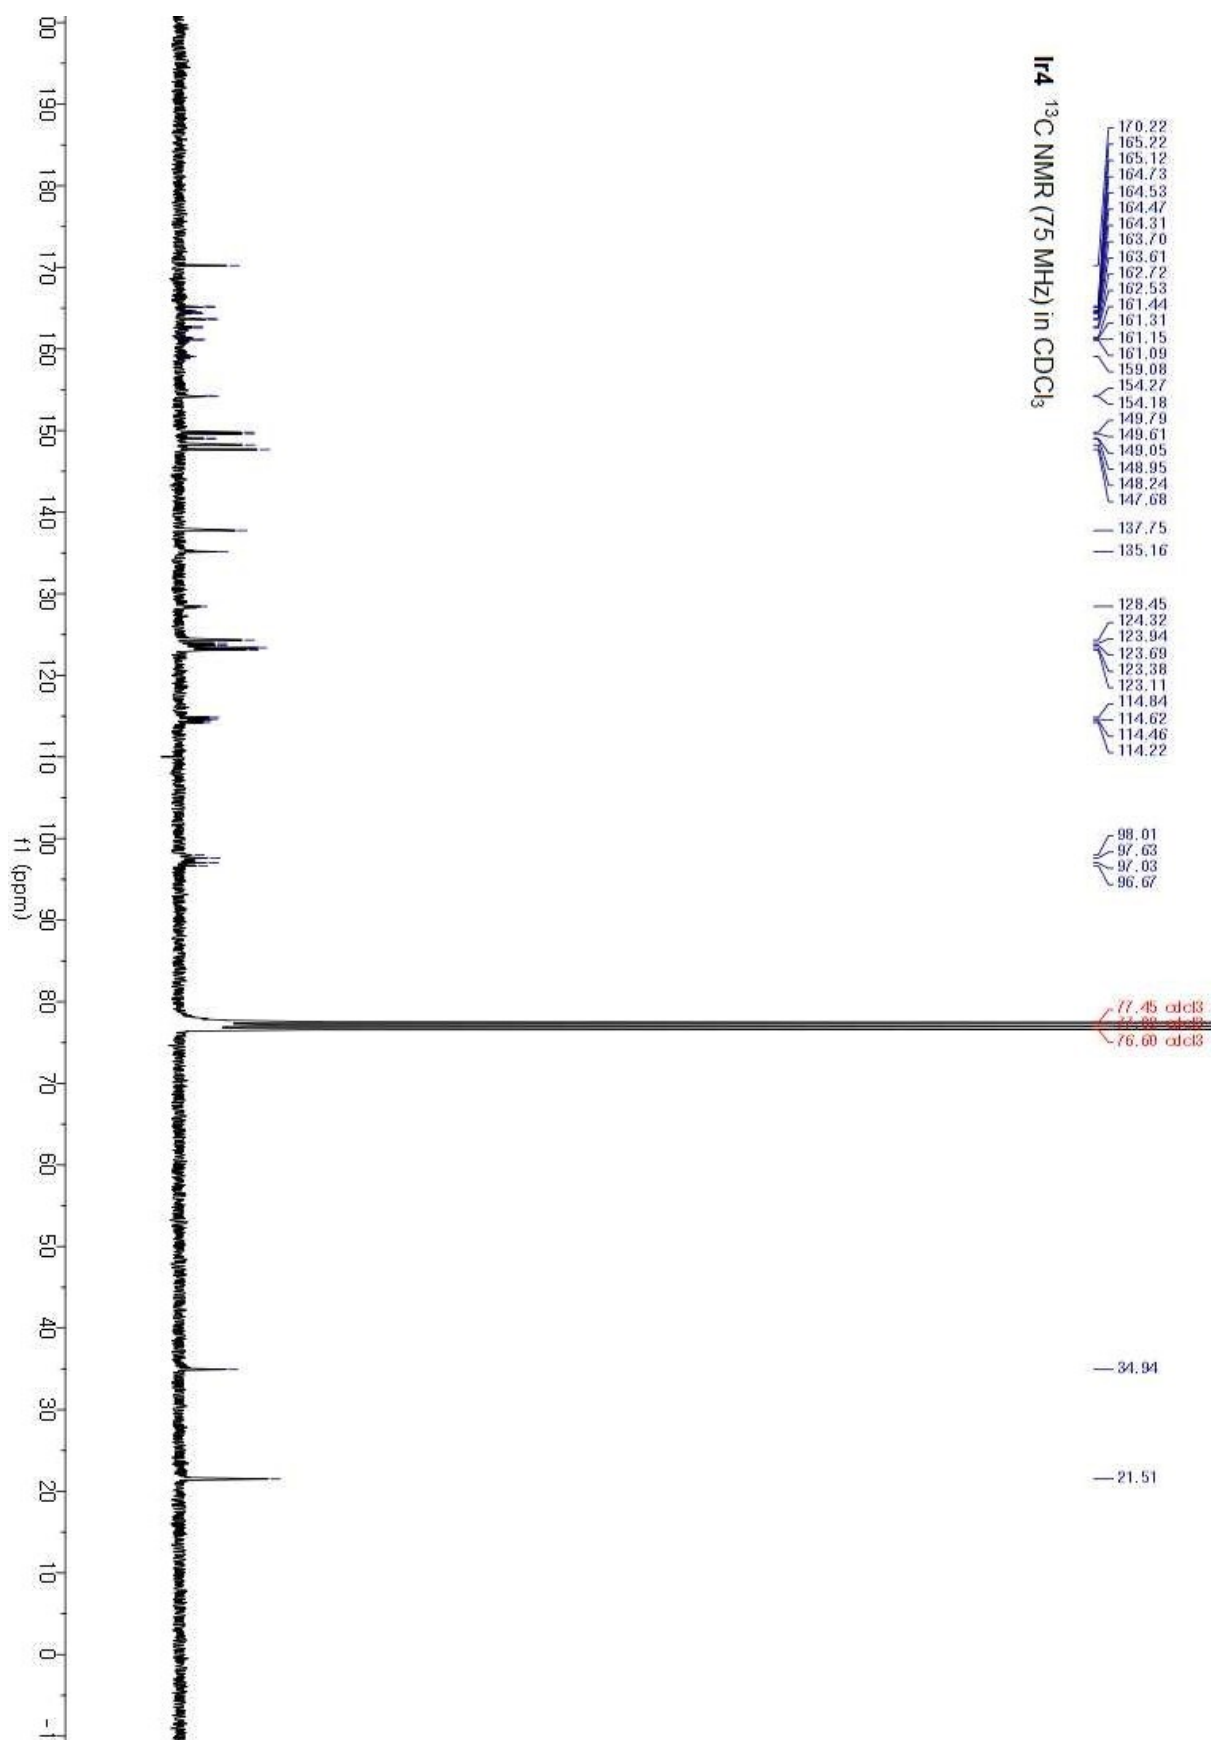

Figure S21.  $^{13}\text{C}$ -NMR spectra of **Ir4**.

Supplementary Information

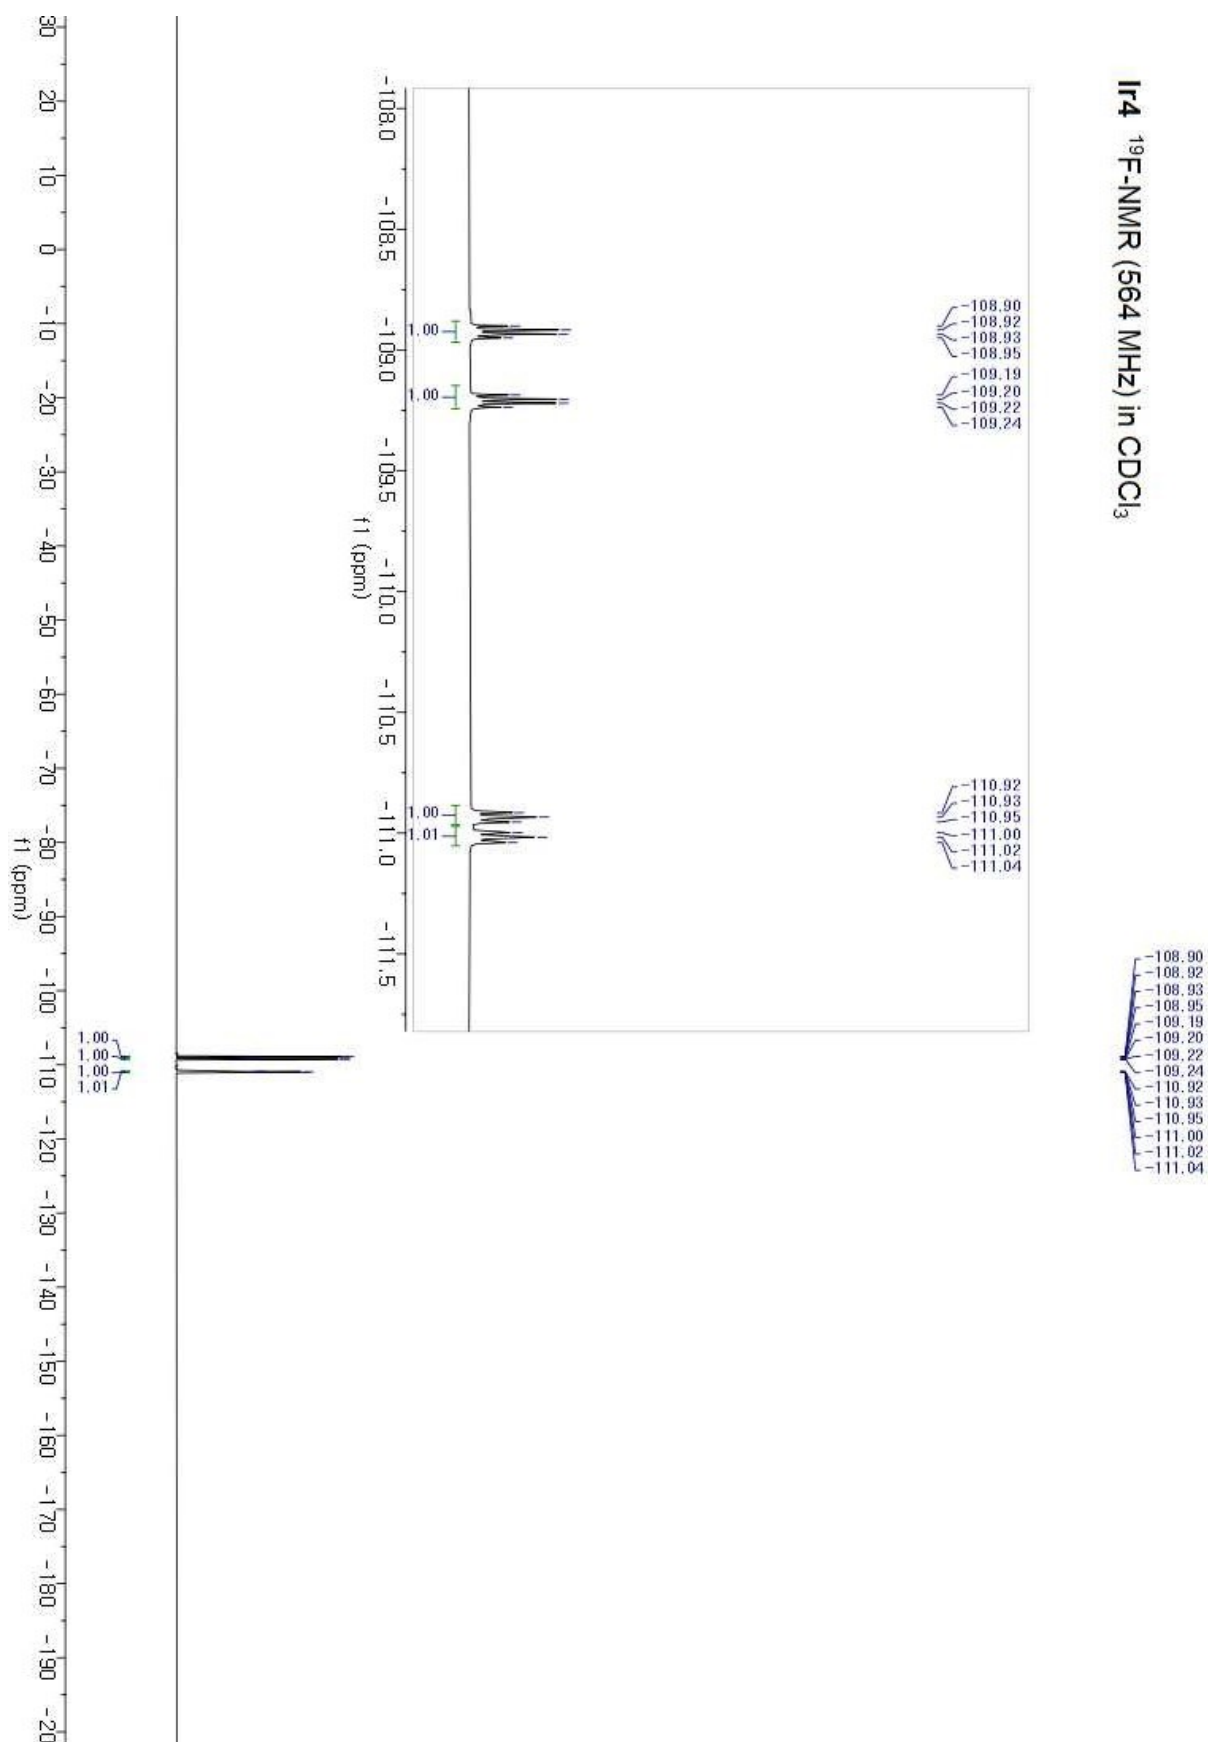

Figure S22.  $^{19}\text{F}$ -NMR spectra of **Ir4**.
